# Supplementary material
Source: PubMed Central journal article supplement (PMC6258853)
Supplement: zjm012186203s1.pdf [file zjm012186203s1.pdf]

**Supplementary Table S1.** Characteristics of 16 orthopedic *Corynebacterium* sp. infections

| No. | Age <sup>a</sup> ,<br>sex | Diagnosis,<br>year | Joint/<br>site | Clinic                             | Relevant pathogens                                                                                                                                             | Diagnostic<br>under AB | Surgical<br>treatment | Targeted AB treatment                                                                     |
|-----|---------------------------|--------------------|----------------|------------------------------------|----------------------------------------------------------------------------------------------------------------------------------------------------------------|------------------------|-----------------------|-------------------------------------------------------------------------------------------|
| 1   | 67, m                     | PJI, 2015          | Knee           | Sinus tract,<br>wound secretion    | <i>Corynebacterium<br/>simulans.</i><br><i>Staphylococcus<br/>epidermidis,</i><br><i>Pseudomonas<br/>aeruginosa</i>                                            | Yes                    | Two-stage             | Vancomycin/cefepime (iv)<br>then vancomycin<br>(iv)/ciprofloxacin (po)                    |
| 2   | 67, m                     | PJI, 2015          | Knee           | Wound<br>secretion, sinus<br>tract | <i>Corynebacterium.<br/>aurimucosum,</i><br><i>Staphylococcus<br/>lugdunensis,</i><br><i>Enterococcus faecalis,</i><br><i>Stenotrophomonas<br/>maltophilia</i> | No                     | Two stage             | Amoxicillin/vancomycin (iv),<br>then<br>trimethoprim/sulfamethox<br>(po)/amoxicillin (po) |

| No. | Age <sup>a</sup> ,<br>sex | Diagnosis,<br>year | Joint/<br>site | Clinic                                 | Relevant pathogens                                                          | Diagnostic<br>under AB | Surgical<br>treatment | Targeted AB treatment                                |
|-----|---------------------------|--------------------|----------------|----------------------------------------|-----------------------------------------------------------------------------|------------------------|-----------------------|------------------------------------------------------|
| 3   | 84, f                     | PJI, 2012          | Hip            | Pain, sinus tract                      | <i>Corynebacterium</i> sp.,<br><i>Candida albicans</i>                      | Yes                    | Girdlestone           | Suppression tx with<br>amoxicillin, fluconazole (po) |
| 4   | 55, m                     | PJI, 2015          | Knee           | Erythema, fever,<br>sinus tract        | <i>C. striatum</i>                                                          | Yes                    | Amputation            | No                                                   |
| 5   | 80, f                     | OIAI, 2007         | Knee           | Hematoma,<br>wound healing<br>disorder | <i>C. amycolatum</i>                                                        | No                     | DAIR                  | Vancomycin (iv)/rifampin (po)                        |
| 6   | 52, f                     | OIAI, 2010         | Foot           | Wound<br>secretion, sinus<br>tract     | Coagulase-negative<br>staphylococci, <i>C.</i><br><i>tuberculostearicum</i> | Yes                    | DAIR                  | Ciprofloxacin/rifampin/clinda<br>mycin (po)          |
| 7   | 44, m                     | OIAI, 2012         | Foot           | Pain with<br>persistent                | <i>C. ureicelerivorans</i>                                                  | Yes                    | Amputation            | No                                                   |

| No. | Age <sup>a</sup> ,<br>sex | Diagnosis,<br>year           | Joint/<br>site  | Clinic                                       | Relevant pathogens                                                    | Diagnostic<br>under AB | Surgical<br>treatment     | Targeted AB treatment                                            |
|-----|---------------------------|------------------------------|-----------------|----------------------------------------------|-----------------------------------------------------------------------|------------------------|---------------------------|------------------------------------------------------------------|
|     |                           |                              |                 | infection since<br>2010, sinus tract         |                                                                       |                        |                           |                                                                  |
| 8   | 65, f                     | OIAI, 2011                   | Foot/Fi<br>bula | Wound healing<br>disorder                    | <i>C. striatum</i>                                                    | No                     | Osteosynthesis<br>removal | Vancomycin (iv)/rifampin (po)<br>then fusidic acid/rifampin (po) |
| 9   | 39, m                     | OIAI, 2009                   | Foot            | Wound healing<br>disorder,<br>pseudarthrosis | <i>C. tuberculostearicum</i> ,<br>coagulase-negative<br>staphylococci | No                     | Osteosynthesis<br>removal | Vancomycin (iv)/clindamycin<br>(po)                              |
| 10  | 60, f                     | Septic<br>arthritis,<br>2013 | Hip             | Wound healing<br>disorder,<br>swelling, pain | <i>C. striatum</i>                                                    | No                     | Debridement               | Vancomycin (iv) then<br>levofloxacin/rifampin (po)               |
| 11  | 25, m                     | STI after<br>sarcoma         | Hip             | Wound healing<br>disorder                    | <i>C. tuberculostearicum</i>                                          | Yes                    | Debridement               | Vancomycin (iv)                                                  |

| No. | Age <sup>a</sup> ,<br>sex | Diagnosis,<br>year               | Joint/<br>site | Clinic                    | Relevant pathogens                                                                                                                                    | Diagnostic<br>under AB | Surgical<br>treatment | Targeted AB treatment                             |
|-----|---------------------------|----------------------------------|----------------|---------------------------|-------------------------------------------------------------------------------------------------------------------------------------------------------|------------------------|-----------------------|---------------------------------------------------|
|     |                           | surgery,<br>2011                 |                |                           |                                                                                                                                                       |                        |                       |                                                   |
| 12  | 55, f                     | STI after<br>amputation,<br>2007 | Knee           | Wound healing<br>disorder | <i>C. amycolatum</i> , <i>E. coli</i>                                                                                                                 | Yes                    | Debridement           | Amoxicillin/clavulanate (iv)                      |
| 13  | 51, m                     | U, 2015                          | Foot           | Wound healing<br>disorder | <i>Corynebacterium<br/>diphtheriae</i> biovar mitis,<br><i>Streptococcus<br/>anginosus</i> , <i>Escherichia<br/>coli</i> , <i>Eikenella corrodens</i> | No                     | Amputation            | Amoxicillin/clavulanate (iv)<br>levofloxacin (po) |
| 14  | 62, f                     | UwO, 2007                        | Foot           | Wound healing<br>disorder | <i>C. amycolatum</i> , <i>E. coli</i> ,<br><i>S. epidermidis</i>                                                                                      | No                     | Debridement           | Ciprofloxacin/clindamycin<br>(po)                 |

| No. | Age <sup>a</sup> ,<br>sex | Diagnosis,<br>year         | Joint/<br>site | Clinic                      | Relevant pathogens                                                                                                                                             | Diagnostic<br>under AB | Surgical<br>treatment | Targeted AB treatment        |
|-----|---------------------------|----------------------------|----------------|-----------------------------|----------------------------------------------------------------------------------------------------------------------------------------------------------------|------------------------|-----------------------|------------------------------|
| 15  | 48, m                     | UwO, 2013                  | Foot           | Abscess, wound<br>secretion | <i>C. aurimucosum</i> , <i>C. amycolatum</i> ,<br><i>Streptococcus agalactiae</i> ,<br><i>Staphylococcus caprae</i>                                            | Yes                    | Amputation            | Vancomycin (iv)              |
| 16  | 51, m                     | UwO,<br>(pressure)<br>2013 | Gluteal        | Wound<br>secretion          | <i>Corynebacterium auris</i> ,<br><i>Klebsiella pneumoniae</i> ,<br><i>Enterococcus faecalis</i> ,<br><i>S. epidermidis</i> ,<br><i>Actinomyces turicensis</i> | No                     | Debridement           | Ertapenem/amoxicicillin (iv) |

<sup>a</sup> age at diagnosis, AB, antibiotics; PJI, periprosthetic joint infection; OIAI, orthopedic implant-associated infections; STI, soft tissue infection; U, ulcer; UwO, ulcer with osteomyelitis, DAIR, debridement, antibiotics and implant retention, MR, methicillin resistant; wks, weeks; S, susceptible; R, resistant.

**Supplementary Table S2.** Antibiotic susceptibility testing (AST) of the four most frequently isolated *Corynebacterium* from orthopedic and blood culture samples (2011-2015) using EUCAST breakpoints (1).

| Species                                         | Susceptible isolates (%) |     |     |     |     |     |                  |                  |
|-------------------------------------------------|--------------------------|-----|-----|-----|-----|-----|------------------|------------------|
|                                                 | GEN <sup>1</sup>         | PEN | TET | VAN | CIP | CLI | LZD              | RIF              |
| <i>Corynebacterium amycolatum</i> (n=10)        | 50                       | 20  | 100 | 100 | 20  | 10  | 100 <sup>2</sup> | 80 <sup>2</sup>  |
| <i>Corynebacterium tuberculostearicum</i> (n=9) | 56                       | 22  | 89  | 100 | 11  | 0   | 100 <sup>2</sup> | 50 <sup>2</sup>  |
| <i>Corynebacterium afermentans</i> (n=8)        | 88                       | 38  | 88  | 100 | 75  | 0   | 100 <sup>2</sup> | 100 <sup>2</sup> |
| <i>Corynebacterium striatum</i> (n=7)           | 86                       | 0   | 57  | 100 | 29  | 14  | 100 <sup>2</sup> | 100 <sup>2</sup> |

<sup>1</sup> GEN, gentamicin; PEN, penicillin; TET, tetracycline; VAN, vancomycin; CIP, ciprofloxacin; CLI, clindamycin; LZD, linezolid; RIF, rifampin.

<sup>2</sup> AST data available only for a subset of isolates: *C. amycolatum*, LZD n=4, RIF n=5; *C. tuberculostearicum*, LZD n=5, RIF n=6; *C. afermentans*, LZD n=2, RIF n=3; *C. striatum*, LZD n=1, RIF n=2.

## References

1. **EUCAST.** 2014. The European Committee on Antimicrobial Susceptibility Testing. Breakpoint tables for interpretation of MICs and zone diameters. Version 4.0. <http://www.eucast.org>.
